# Supplementary material for: A strategy for realizing tunable luminescence and full-color emission in Sr3Gd2(Si3O9)2:Eu phosphors by introducing dual functional Mn2+
Source: Royal Society of Chemistry journal article supplement (doi:10.1039/c8qi00731d), 2018-01-01
Supplement: c8qi00731d1.pdf [file c8qi00731d1.pdf]

Table S1 The bond length of Sr1-O with the increase of  $x$ .

| $x$  | O1       | O2       | O3       | O4       | O6       | O7       | O8       | O8       |
|------|----------|----------|----------|----------|----------|----------|----------|----------|
| 0    | 2.079(4) | 2.897(3) | 2.541(4) | 2.736(3) | 2.491(4) | 2.821(3) | 2.296(3) | 2.563(4) |
| 0.09 | 2.787(4) | 2.918(3) | 2.814(4) | 2.405(4) | 2.532(5) | 2.424(3) | 2.993(3) | 2.615(4) |
| 0.18 | 2.748(4) | 3.049(3) | 2.773(4) | 2.369(3) | 2.528(4) | 2.585(3) | 2.649(3) | 2.586(4) |
| 0.27 | 2.913(3) | 3.037(3) | 2.852(3) | 2.427(3) | 2.472(4) | 2.595(2) | 2.652(3) | 2.697(4) |
| 0.36 | 2.971(4) | 3.219(3) | 2.827(4) | 2.397(4) | 2.446(4) | 2.642(3) | 2.479(3) | 2.425(4) |
| 0.45 | 2.496(4) | 3.136(3) | 2.838(3) | 2.080(3) | 2.662(4) | 2.967(3) | 2.705(3) | 2.620(3) |
| 0.54 | 2.815(4) | 3.117(3) | 3.023(4) | 2.419(4) | 2.537(4) | 2.857(4) | 2.584(4) | 2.615(4) |
| 0.63 | 2.628(5) | 3.188(4) | 3.022(4) | 2.031(4) | 2.460(6) | 2.777(5) | 2.464(4) | 2.574(4) |

Table S2 The bond length of Sr2-O with the increase of  $x$ .

| $x$  | O3       | O4       | O4       | O5       | O6       | O8       | O9       |
|------|----------|----------|----------|----------|----------|----------|----------|
| 0    | 2.731(4) | 2.268(3) | 2.916(3) | 3.167(3) | 2.350(4) | 2.418(4) | 2.501(3) |
| 0.09 | 2.599(4) | 2.499(3) | 2.704(4) | 2.976(4) | 2.489(5) | 2.297(4) | 2.615(3) |
| 0.18 | 2.600(3) | 2.372(3) | 2.906(3) | 3.431(3) | 2.533(4) | 2.466(4) | 2.522(3) |
| 0.27 | 2.488(3) | 2.367(3) | 2.779(3) | 3.499(3) | 2.491(4) | 2.409(4) | 2.422(3) |
| 0.36 | 2.609(3) | 2.601(3) | 2.571(4) | 3.508(3) | 2.544(4) | 2.832(4) | 2.320(3) |
| 0.45 | 2.629(3) | 2.872(3) | 2.649(3) | 3.074(3) | 2.751(4) | 2.445(3) | 2.403(4) |
| 0.54 | 2.485(4) | 2.332(4) | 2.804(4) | 3.297(4) | 2.477(4) | 2.422(4) | 2.432(4) |
| 0.63 | 2.767(4) | 3.010(4) | 2.737(4) | 3.336(5) | 2.318(6) | 2.752(4) | 2.311(4) |

Table S3 The bond length of Sr3-O with the increase of  $x$ .

| $x$  | O1       | O1       | O3       | O3       | O9       | O9       |
|------|----------|----------|----------|----------|----------|----------|
| 0    | 2.359(4) | 2.359(4) | 2.421(3) | 2.421(3) | 2.317(3) | 2.317(3) |
| 0.09 | 2.106(4) | 2.106(4) | 2.290(3) | 2.290(3) | 2.237(4) | 2.237(4) |
| 0.18 | 2.055(3) | 2.055(3) | 2.311(3) | 2.311(3) | 2.206(3) | 2.206(3) |
| 0.27 | 1.960(3) | 1.960(3) | 2.255(3) | 2.255(3) | 2.272(2) | 2.272(2) |
| 0.36 | 2.044(3) | 2.044(3) | 2.253(3) | 2.253(3) | 2.266(3) | 2.266(3) |
| 0.45 | 2.222(3) | 2.222(3) | 2.296(4) | 2.296(4) | 2.382(3) | 2.382(3) |
| 0.54 | 1.976(3) | 1.976(3) | 2.222(4) | 2.222(4) | 2.412(4) | 2.412(4) |
| 0.63 | 2.029(4) | 2.029(4) | 2.447(4) | 2.447(4) | 2.636(4) | 2.636(4) |

Table S4 CIE chromaticity coordinates for SGSO:0.03Eu,  $x$ Mn ( $x = 0-0.63$ ) phosphors excited by 350, 313 and 274 nm light.

| SGSO:Eu <sup>2+</sup> , $x$ Mn <sup>2+</sup><br>( $x = 0-0.63$ ) | CIE(X, Y)<br>$\lambda_{\text{ex}} = 350 \text{ nm}$ | CIE(X, Y)<br>$\lambda_{\text{ex}} = 313 \text{ nm}$ | CIE(X, Y)<br>$\lambda_{\text{ex}} = 274 \text{ nm}$ |
|------------------------------------------------------------------|-----------------------------------------------------|-----------------------------------------------------|-----------------------------------------------------|
| $x = 0$                                                          | 0.204, 0.269                                        | 0.243, 0.278                                        | 0.323, 0.297                                        |
| $x = 0.09$                                                       | 0.226, 0.282                                        | 0.287, 0.326                                        | 0.348, 0.337                                        |
| $x = 0.18$                                                       | 0.237, 0.306                                        | 0.299, 0.381                                        | 0.314, 0.345                                        |
| $x = 0.27$                                                       | 0.256, 0.343                                        | 0.310, 0.394                                        | 0.310, 0.364                                        |
| $x = 0.36$                                                       | 0.275, 0.371                                        | 0.324, 0.407                                        | 0.317, 0.354                                        |
| $x = 0.45$                                                       | 0.289, 0.395                                        | 0.335, 0.416                                        | 0.329, 0.366                                        |
| $x = 0.54$                                                       | 0.306, 0.414                                        | 0.345, 0.427                                        | 0.333, 0.375                                        |
| $x = 0.63$                                                       | 0.319, 0.415                                        | 0.347, 0.433                                        | 0.329, 0.367                                        |

Table S5 Chromaticity shift of SGSO:0.03Eu, 0.09Mn ( $\lambda_{\text{ex}} = 274$  nm) as a function of temperature.

|                             |        |        |       |       |       |       |       |
|-----------------------------|--------|--------|-------|-------|-------|-------|-------|
| T(K)                        | 323    | 348    | 373   | 398   | 423   | 448   | 473   |
| $\Delta C (\times 10^{-2})$ | 0.0112 | 0.0892 | 0.379 | 0.746 | 1.168 | 1.594 | 1.997 |

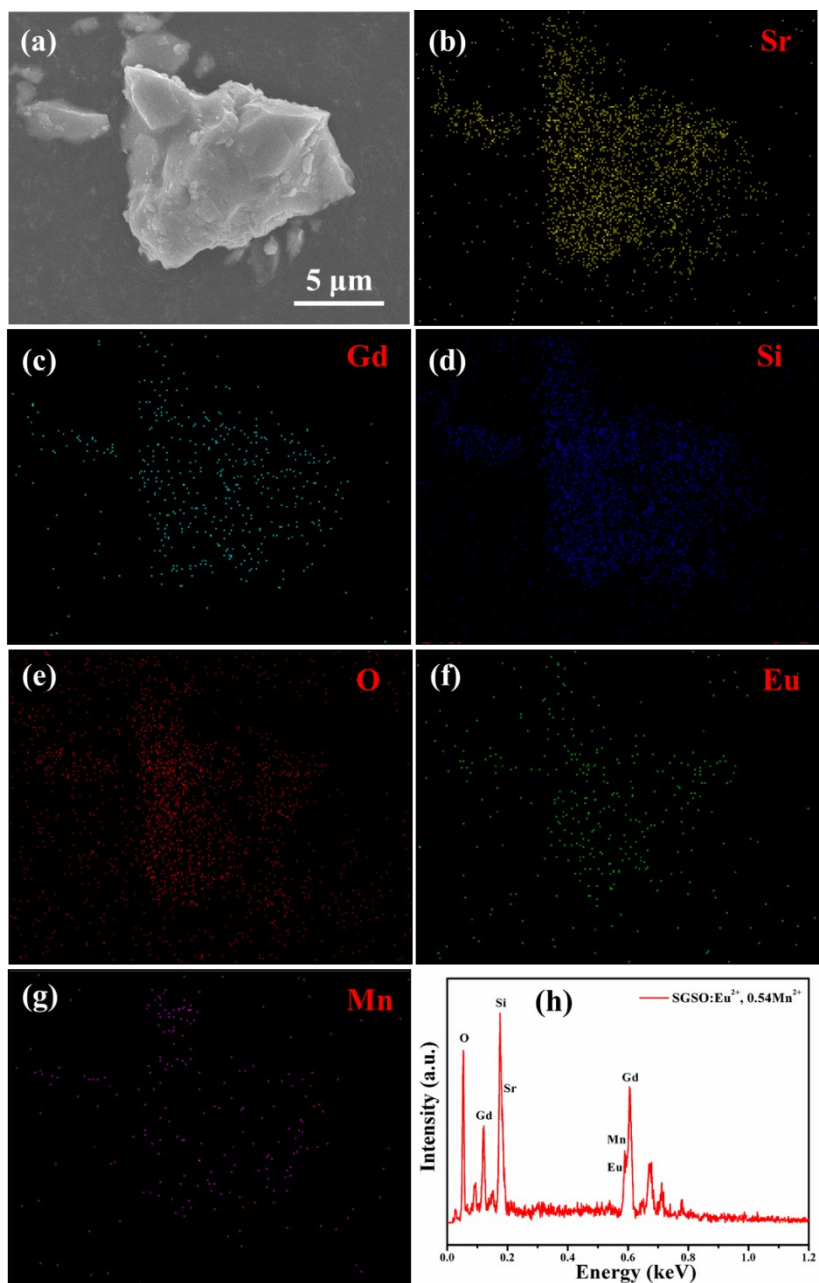

Fig. S1 (a) SEM elemental mapping, (b) and the EDS spectra of the sample SGSO:0.03Eu, 0.54Mn.

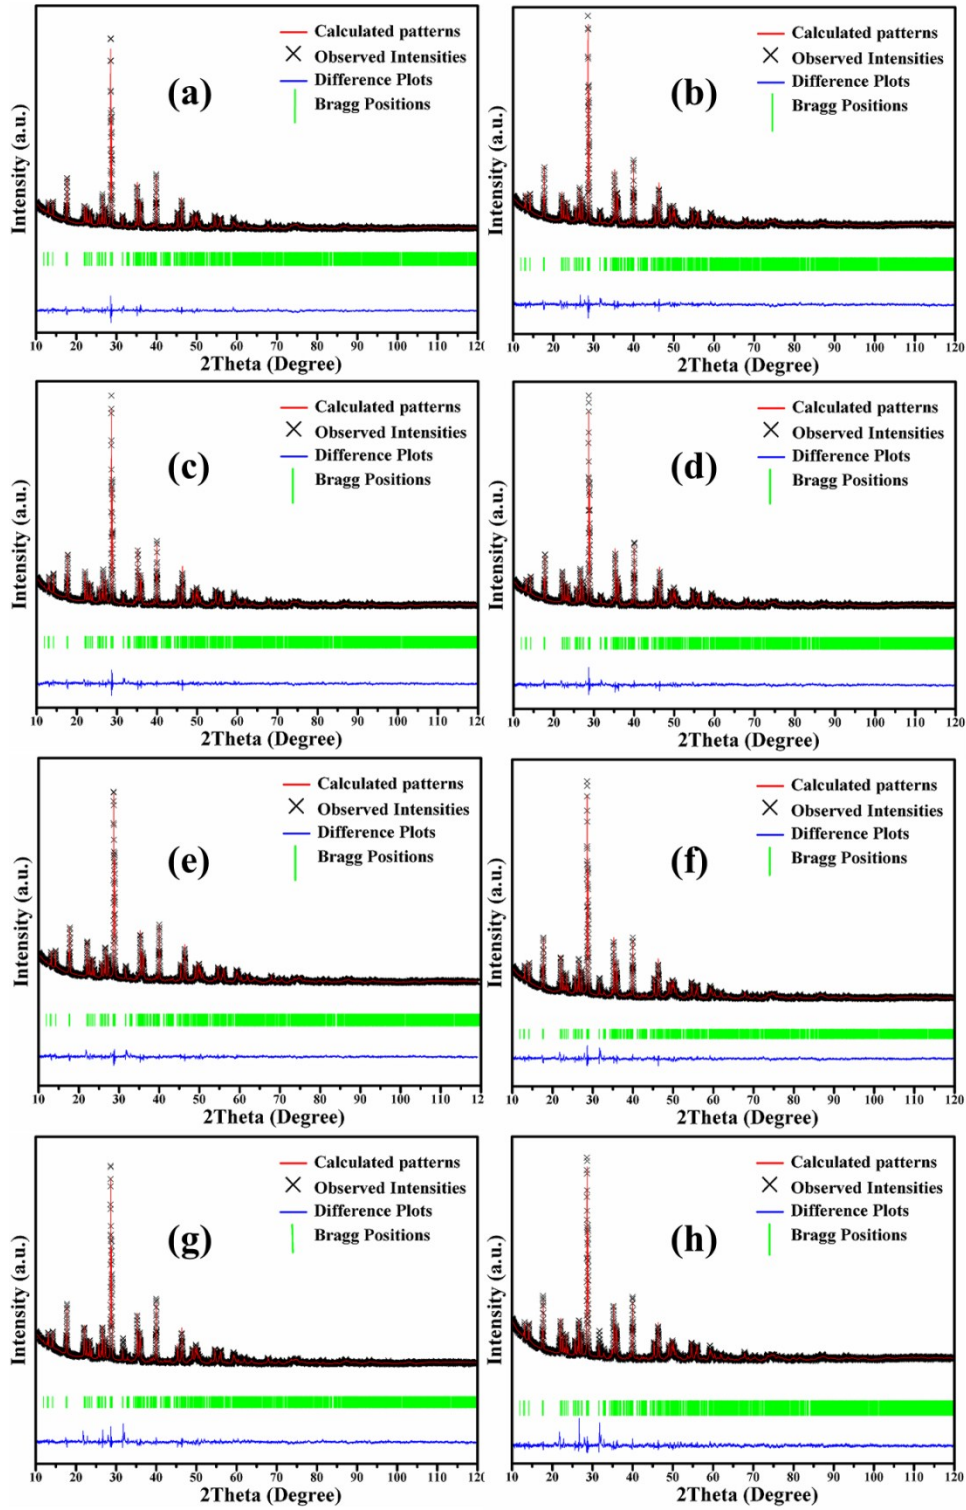

Fig. S2 (a)-(h) XRD Rietveld refinement of SGSO:0.03Eu, xMn ( $x = 0-0.63$ ) with the data and the fit represented by points and the line, respectively.

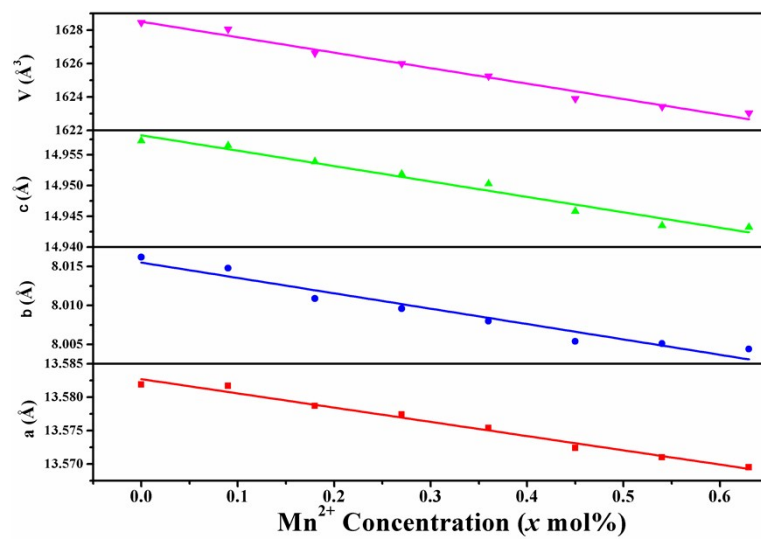

Fig. S3 Cell parameters  $a$ ,  $b$ ,  $c$  and volume  $V$  as a function of Mn doping concentration  $x$ .



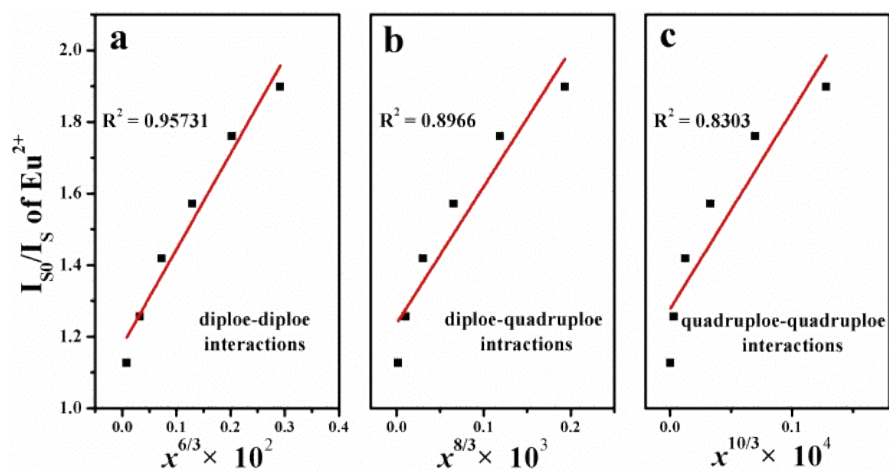

Fig. S4 Dependence of  $I_{S0}/I_S$  of  $\text{Eu}^{2+}$  on (a)  $x^{6/3}$ , (b)  $x^{8/3}$  and (c)  $x^{10/3}$ .
